# Supplementary material for: Ga(III) Nanoparticles Inhibit Growth of both Mycobacterium tuberculosis and HIV and Release of Interleukin-6 (IL-6) and IL-8 in Coinfected Macrophages
Source: Antimicrob Agents Chemother. 2017 Mar 24;61(4):e02505-16. doi: 10.1128/AAC.02505-16 (PMC5365726; doi:10.1128/AAC.02505-16)
Supplement: Supplemental material [file AAC.02505-16_zac004176069s1.pdf]

# Supporting Information

## **Ga(III) Nanoparticles Inhibit Growth of Both TB and HIV and Release of IL-6 and IL-8 in Co-Infected Macrophages**

*Seoung-ryoung Choi<sup>1</sup>, Bradley E. Britigan<sup>1,2,3</sup> and Prabakaran Narayanasamy<sup>1,\*</sup>*

<sup>1</sup>Department of Pathology and Microbiology, <sup>2</sup>Department of Internal Medicine, College of Medicine, University of Nebraska Medical Center, Omaha, Nebraska 68198 and <sup>3</sup>Research Service, VA Medical Center-Nebraska Western Iowa, Omaha, Nebraska 68105.

Corresponding author: p.narayanasamy@unmc.edu

|                                                                                                                      |   |
|----------------------------------------------------------------------------------------------------------------------|---|
| Figure S1. Toxicity of Ga nanoparticle (GaNP) against THP-1 macrophages.....                                         | 2 |
| Figure S2. Antimicrobial activities of GaNP and combination of GaNP and FeNO <sub>3</sub> .....                      | 2 |
| Figure S3. <i>M.tb</i> (H37Ra) growth inhibition in THP-1 macrophages by Ga nanoparticles or GaNO <sub>3</sub> ..... | 2 |
| Figure S4. Fluorescence intensity of IL-6 and IL-8 in supernatants from TB-infected macrophages.....                 | 3 |
| Figure S5. Fluorescence intensity of IL-1 presented in supernatants from co-infected macrophages.....                | 3 |
| Figure S6. Fluorescence intensity of TNF- $\alpha$ presented in supernatants from co-infected macrophages.....       | 3 |
| Figure S7. Fluorescence intensity of IL-4 presented in supernatants from co-infected macrophages.....                | 4 |
| Figure S8. Fluorescence intensity of GMCSF presented in supernatants from co-infected macrophages...                 | 4 |
| Figure S9. Fluorescence intensity of IFN- $\gamma$ presented in supernatants from co-infected macrophages.....       | 4 |
| Figure S10. Release of IL-6 and IL-8 by MDMs in the presence of MCSF.....                                            | 5 |
| Figure S11. Western blot analysis of pP38 and pAkt from macrophages treated with GaNP.....                           | 5 |

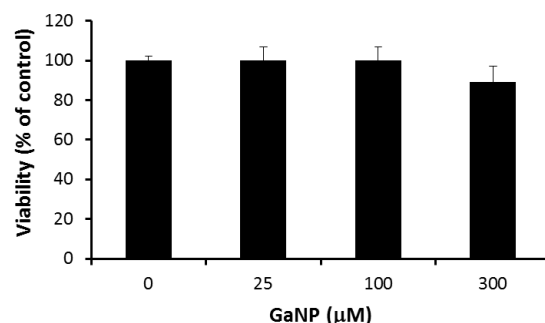

Figure S1. Toxicity of Ga nanoparticle (GaNP) against THP-1 macrophages. In a 48 well plate,  $3 \times 10^5$  cells/well were seeded. The wells were treated with various concentrations of GaNP for 24 hour, and then the wells were washed with PBS buffer thoroughly. The GaNP-treated macrophages were further incubated for additional 24 hour and viability was determined using resazurin reduction assay.

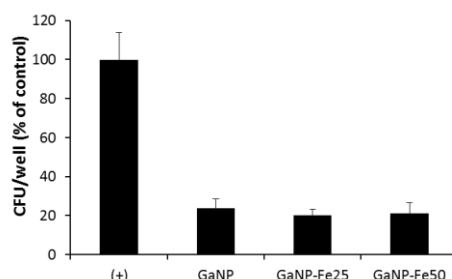

Figure S2. Antimicrobial activities of GaNP and combination of GaNP and  $\text{FeNO}_3$ . THP-1 macrophages ( $0.67 \times 10^6$ ) were incubated with GaNP (300  $\mu\text{M}$ ) or combination of GaNP (300  $\mu\text{M}$ ) and  $\text{FeNO}_3$  (25 or 50  $\mu\text{M}$ ) for 24 hours, following which the cultures were washed free of extracellular drug. These macrophages were then infected with *M.tb* (H37Ra, MOI = 1) for 4 hours and allowed to grow for 2 days. Data represents the mean  $\pm$  SEM of triplicate (n = 3). (+): *M.tb* Infection.

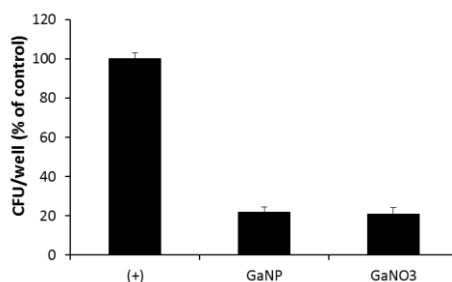

Figure S3. *M.tb* (H37Ra) growth inhibition in THP-1 macrophages by Ga nanoparticles or  $\text{GaNO}_3$ . THP-1 macrophages ( $0.67 \times 10^6$ ) were incubated with GaNP (300  $\mu\text{M}$ ) or and  $\text{GaNO}_3$  (300  $\mu\text{M}$ ) for 24 hours. The cultures were washed free of extracellular drug with PBS buffer. These macrophages were then infected with *M.tb* (H37Ra, MOI = 1) for 4 hours and allowed to grow for 2 days at day 5 following treatments. Growth of *M.tb* was monitored over time by determining *M.tb* CFU as per Methods. Data represents the mean  $\pm$  SEM of triplicate (n = 3). (+): *M.tb* Infection.

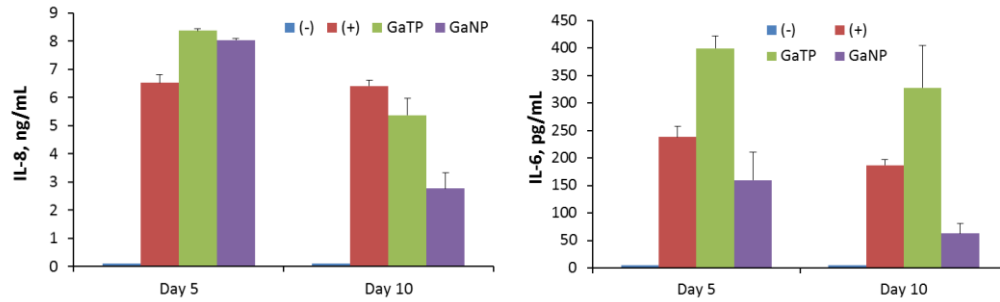

**Figure S4.** Fluorescence intensity of IL-6 and IL-8 presented in supernatants from TB-infected macrophages. MDMs were co-infected with *M.tb* (H37Ra) at Day 5 and 10 following drug treatment. Following infections, supernatants were analyzed for detection of cytokines released from infected macrophages day 2 after infection. (+); positive control (infection only). (-); negative control (no infection).

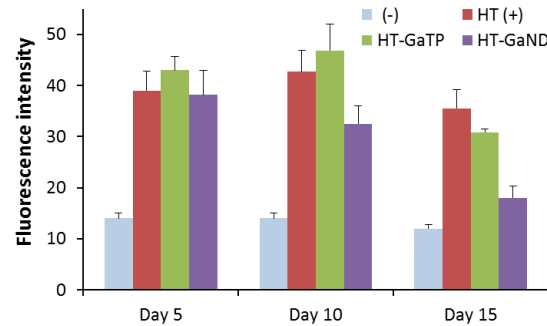

**Figure S5.** Fluorescence intensity of IL-1 presented in supernatants from co-infected macrophages. MDMs were co-infected with HIV and *M.tb* (H37Ra) at Day 5, 10 and 15 following drug treatment. Following infections, supernatants were analyzed for detection of cytokines released from infected macrophages day 2 after infection. HT; HIV/TB co-infection. (+); positive control. (-); negative control.

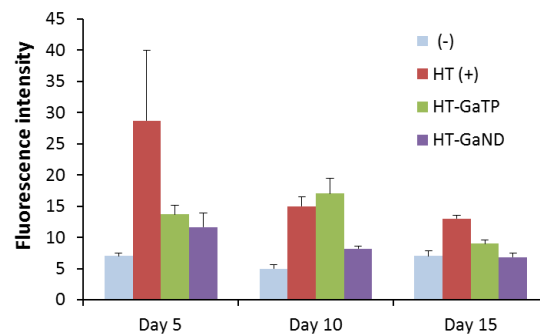

**Figure S6.** Fluorescence intensity of TNF- $\alpha$  presented in supernatants from co-infected macrophages. MDMs were co-infected with HIV and *M.tb* (H37Ra) at Day 5, 10 and 15 following drug treatment. Following infections, supernatants were analyzed for detection of cytokines released from infected macrophages day 2 after infection. HT; HIV/TB co-infection. (+); positive control. (-); negative control.

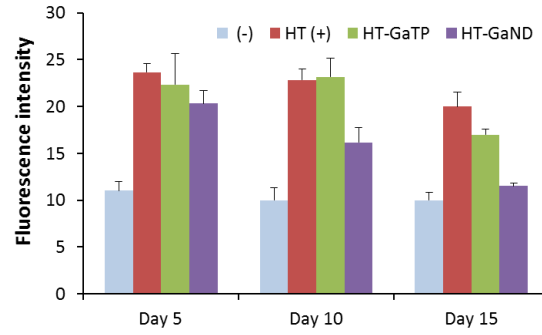

**Figure S7.** Fluorescence intensity of IL-4 presented in supernatants from co-infected macrophages. MDMs were co-infected with HIV and *M.tb* (H37Ra) at Day 5, 10 and 15 following drug treatment. Following infections, supernatants were analyzed for detection of cytokines released from infected macrophages day 2 after infection. HT; HIV/TB co-infection. (+); positive control. (-); negative control.

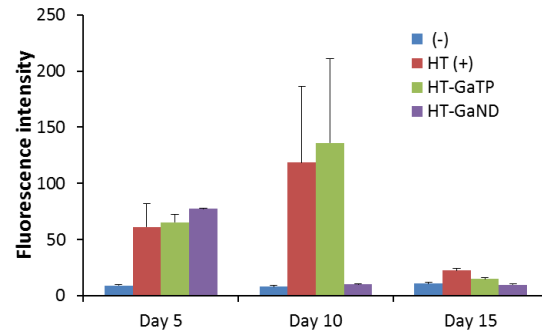

**Figure S8.** Fluorescence intensity of GM-CSF presented in supernatants from co-infected macrophages. MDMs were co-infected with HIV and *M.tb* (H37Ra) at Day 5, 10 and 15 following drug treatment. Following infections, supernatants were analyzed for detection of cytokines released from infected macrophages day 2 after infection. HT; HIV/TB co-infection. (+); positive control. (-); negative control.

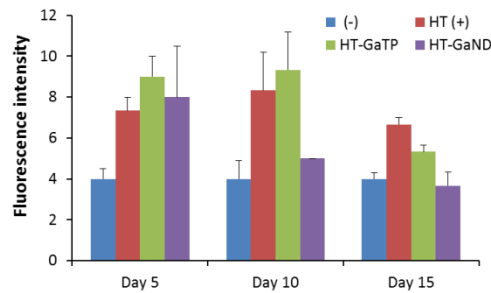

**Figure S9.** Fluorescence intensity of IFN-γ presented in supernatants from co-infected macrophages. MDMs were co-infected with HIV and *M.tb* (H37Ra) at Day 5, 10 and 15 following drug treatment. Following infections, supernatants were analyzed for detection of cytokines released from infected macrophages day 2 after infection. HT; HIV/TB co-infection. (+); positive control. (-); negative control.

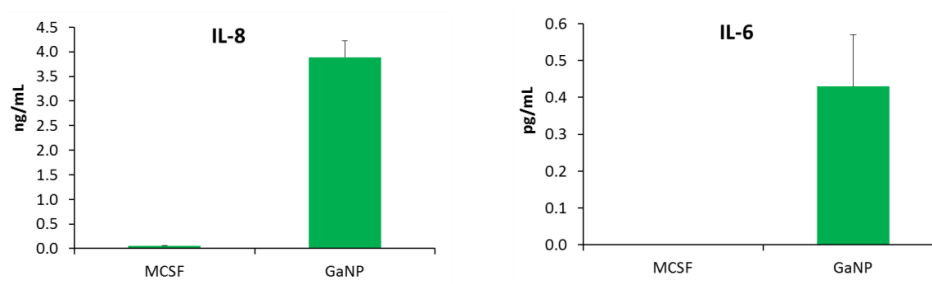

**Figure S10.** Release of IL-6 and IL-8 by MDMs in the presence of MCSF, compared with GaNP treated MDMs exposed to the same agents.

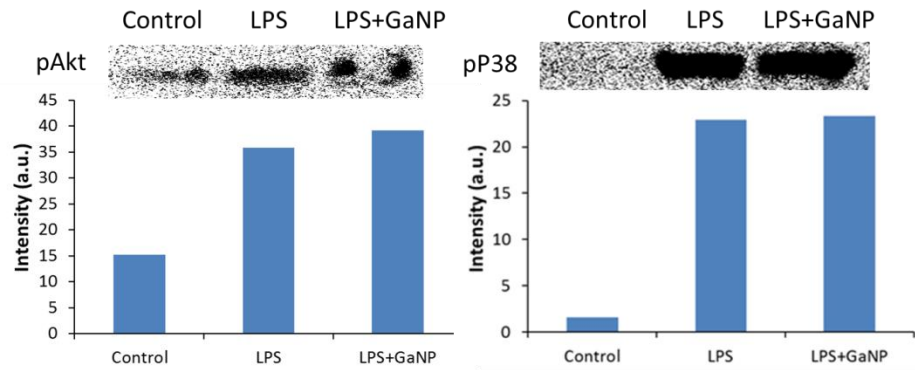

**Figure S11.** Western blot analysis of pP38 and pAkt from macrophages treated with GaNP. Macrophages were polarized by LPS. No changes were observed in expressions of pP38 and pAkt between GaNP-treated and non-treated macrophages. Control: No polarization of monocytes by LPS.
